# Supplementary material
Source: Springer Nature journal article supplement (https://www.springermedizin.de/resource/supplementary/12888_2013_1665_MOESM2_ESM.pdf/9481080)
Supplement: MOESM2 [file 9481080]

Additional file 2: Table S2. Inter-rater agreement on diagnoses assessed by two expert opinions

Diagnoses assessed by second expert opinion

| Diagnoses assessed by first expert opinion   | Diagnoses assessed by second expert opinion |    |    |          |    |          |    |    |    |          |     |          |     |          |
|----------------------------------------------|---------------------------------------------|----|----|----------|----|----------|----|----|----|----------|-----|----------|-----|----------|
|                                              | 1.                                          | 2. | 3. | 4.       | 5. | 6.       | 7. | 8. | 9. | 10.      | 11. | 12.      | 13. | 14.      |
| 1.Mild depressive episode                    |                                             |    |    |          |    |          |    |    |    |          |     |          |     |          |
| 2.Moderate depressive episode                |                                             |    | 1  | 1        |    |          |    |    |    |          |     |          |     |          |
| 3.Severe depressive episode                  |                                             |    |    |          |    |          |    |    |    |          |     |          |     |          |
| 4.Major depressive episode, recurrent        | 2                                           |    |    | <u>1</u> |    |          |    |    |    |          |     |          |     |          |
| 5.Dysthymia                                  | 1                                           |    |    |          |    |          |    |    |    |          |     |          |     |          |
| 6.Social phobias                             |                                             |    |    |          |    | <u>1</u> |    |    |    |          |     |          |     | 1        |
| 7.Panic disorder                             |                                             |    |    |          |    |          |    |    |    |          |     |          |     |          |
| 8.General anxiety disorder                   |                                             |    |    |          |    |          |    |    |    |          |     |          |     | 1        |
| 9.Mixed anxiety and depressive disorder      |                                             |    |    |          |    |          | 1  |    |    |          |     |          |     |          |
| 10.PTSD                                      |                                             |    |    |          |    |          |    |    |    | <u>1</u> |     |          |     |          |
| 11.Drug dependence and abuse                 |                                             |    |    |          |    |          |    |    |    |          |     |          |     |          |
| 12.Emotionally unstable personality disorder |                                             |    |    |          |    |          |    |    |    |          | 1   | <u>1</u> |     |          |
| 13.Tic disorders                             | 1                                           |    |    |          |    |          |    |    |    |          |     |          |     |          |
| 14.No diagnosis                              |                                             |    |    |          |    |          |    |    | 1  |          |     | 1        |     | <u>1</u> |

The table includes only the diagnoses that were applied by the assessors. The vertical and horizontal axes represent the diagnoses given by the first and second raters, respectively. The numbers in the cells show the frequency of each combination of diagnoses. Underlined numbers indicate full agreement.
